# Supplementary material
Source: PubMed Central journal article supplement (PMC130578)

**A**

| Soluble analyte |                                | $k_{on}$ ( $10^4 \text{ M}^{-1} \text{ s}^{-1}$ ) | $k_{off}$ ( $10^{-3} \text{ s}^{-1}$ ) | $K_a$ ( $10^6 \text{ M}^{-1}$ ) |
|-----------------|--------------------------------|---------------------------------------------------|----------------------------------------|---------------------------------|
| scSLC*          | Kinetic study <sup>k</sup>     | $5.23 \pm 0.67$                                   | $17.50 \pm 4.95$                       | $3.12 \pm 1.26^a$               |
|                 | Equilibrium study <sup>#</sup> |                                                   |                                        | $2.34 \pm 0.95^b$               |
| $\lambda$ -like | Kinetic study <sup>k</sup>     | $1.60 \pm 0.39$                                   | $12.00 \pm 2.65$                       | $1.29 \pm 0.14^a$               |

$k_{on}$  and  $k_{off}$  : association and dissociation rate constant, respectively.

$K_a^a$  and  $K_a^b$  : apparent affinity constant calculated from the  $k_{on}/k_{off}$  ratio and the  $Req/C=f(Req)$  plot, respectively.

<sup>k</sup> Values obtained for the kinetic studies are representative of 2 and 3 independent experiments for the scSLC\* and  $\lambda$ -like, respectively.

<sup>#</sup> Values obtained for the equilibrium studies are representative of 3 independent experiments.

**B**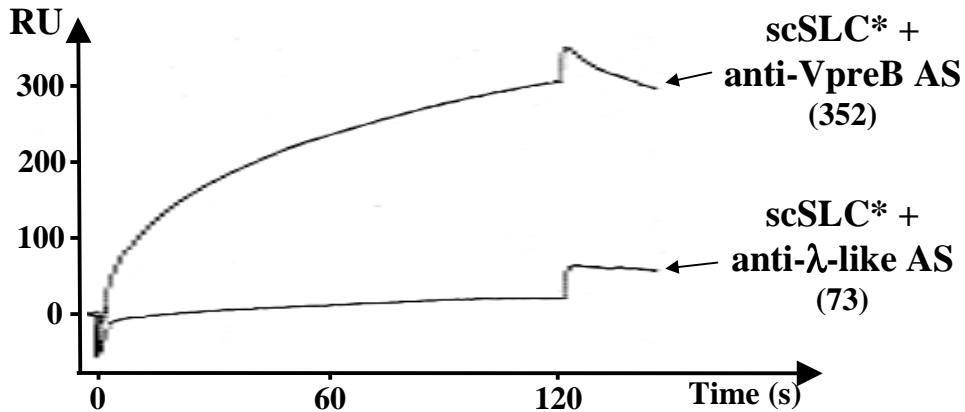**C**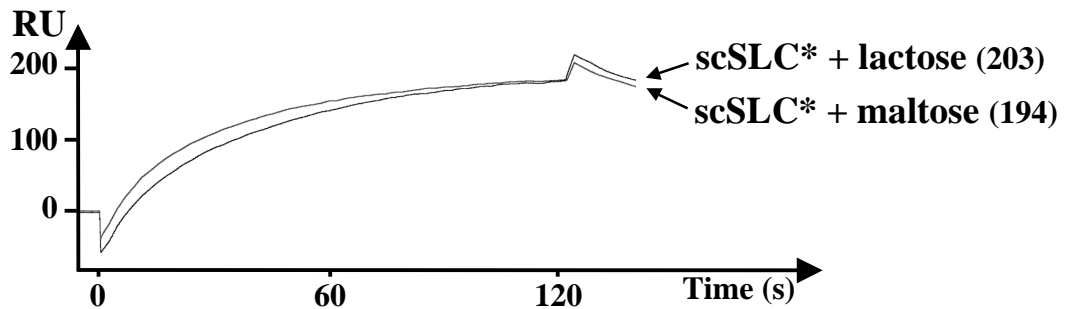

Supplement: pnas_202323999_11.pdf [file pnas_202323999_11.pdf]
