# Supplementary material
Source: PubMed Central journal article supplement (PMC130578)

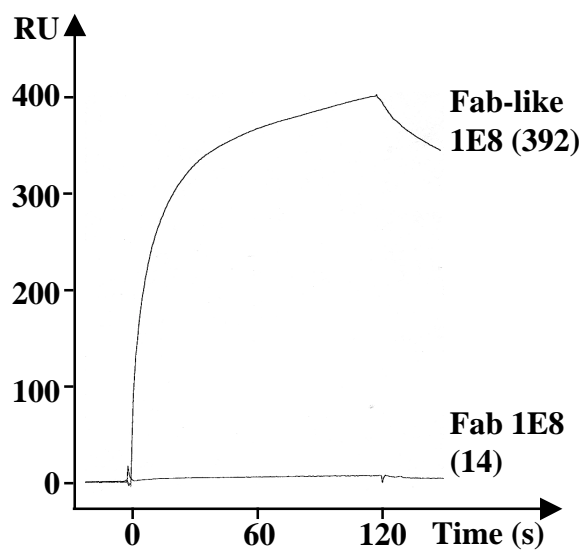

Supplement: pnas_202323999_10.pdf [file pnas_202323999_10.pdf]

**Nalm6 / C8**

**70Z3 / MS5.1**

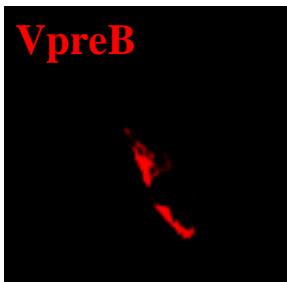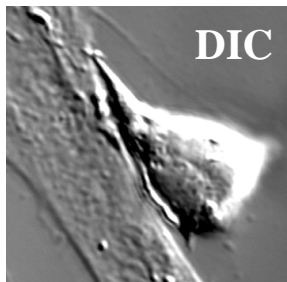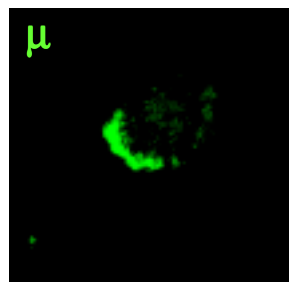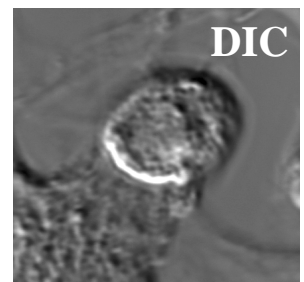

Supplement: pnas_202323999_12.pdf [file pnas_202323999_12.pdf]

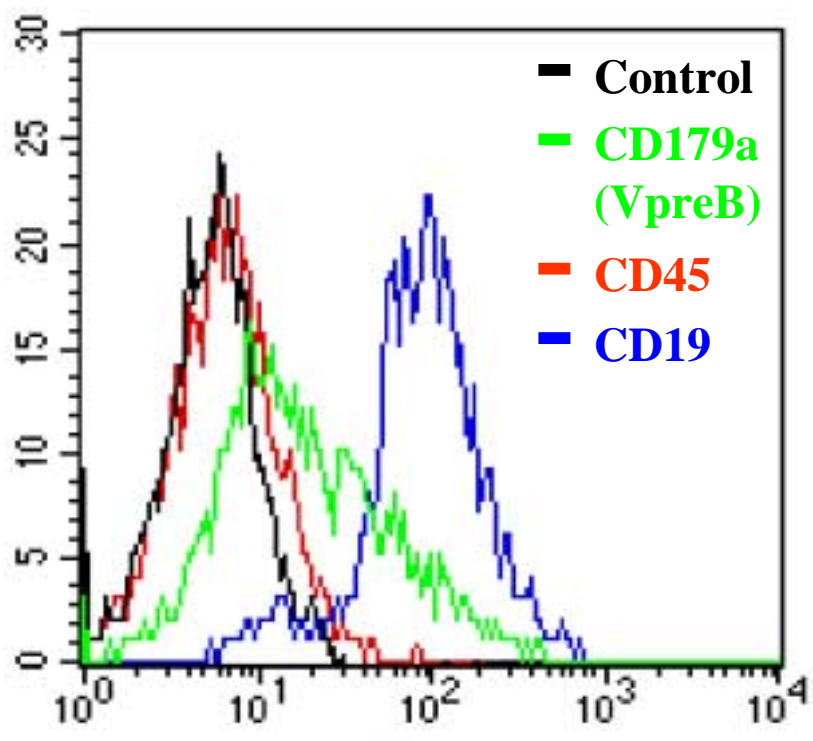

Supplement: pnas_202323999_13.pdf [file pnas_202323999_13.pdf]
